# Supplementary material
Source: HighWire-hosted journal article supplement (https://jnm.snmjournals.org/highwire/filestream/94889/field_highwire_adjunct_files/0/166769_Supplemental_Data.pdf)
Supplement: 166769_Supplemental_Data.pdf [file 166769_Supplemental_Data.pdf]

**Supplemental Table 1. Predictive value of FLT and FDG iPET scans**

|                       | 5-point score | Number of patients | Death or progression | Sensitivity | Specificity | NPV   | PPV   |
|-----------------------|---------------|--------------------|----------------------|-------------|-------------|-------|-------|
| FLT iPET post cycle 1 | ≤3            | 12                 | 0                    | 100%        | 54%         | 100%  | 33%   |
|                       | 4,5           | 15                 | 5                    |             |             |       |       |
| FLT iPET post cycle 2 | ≤3            | 17                 | 0                    | 100%        | 74%         | 100%  | 45%   |
|                       | 4, 5          | 11                 | 5                    |             |             |       |       |
| FLT iPET in total     | ≤3            | 29                 | 0                    | 100%        | 64%         | 100%  | 38.5% |
|                       | 4, 5          | 26                 | 10                   |             |             |       |       |
| FDG iPET*             | ≤3            | 38                 | 2                    | 75%         | 67%         | 94.7% | 24.0% |
|                       | 4, 5          | 25                 | 6                    |             |             |       |       |

\*FDG iPET post cycle 4.
